# Supplementary material
Source: MDPI journal article supplement (https://www.mdpi.com/2071-1050/14/17/10932)
Supplement: s1 [file s1]

## Supplemental Information

### Ames test results for the 4 reference strains

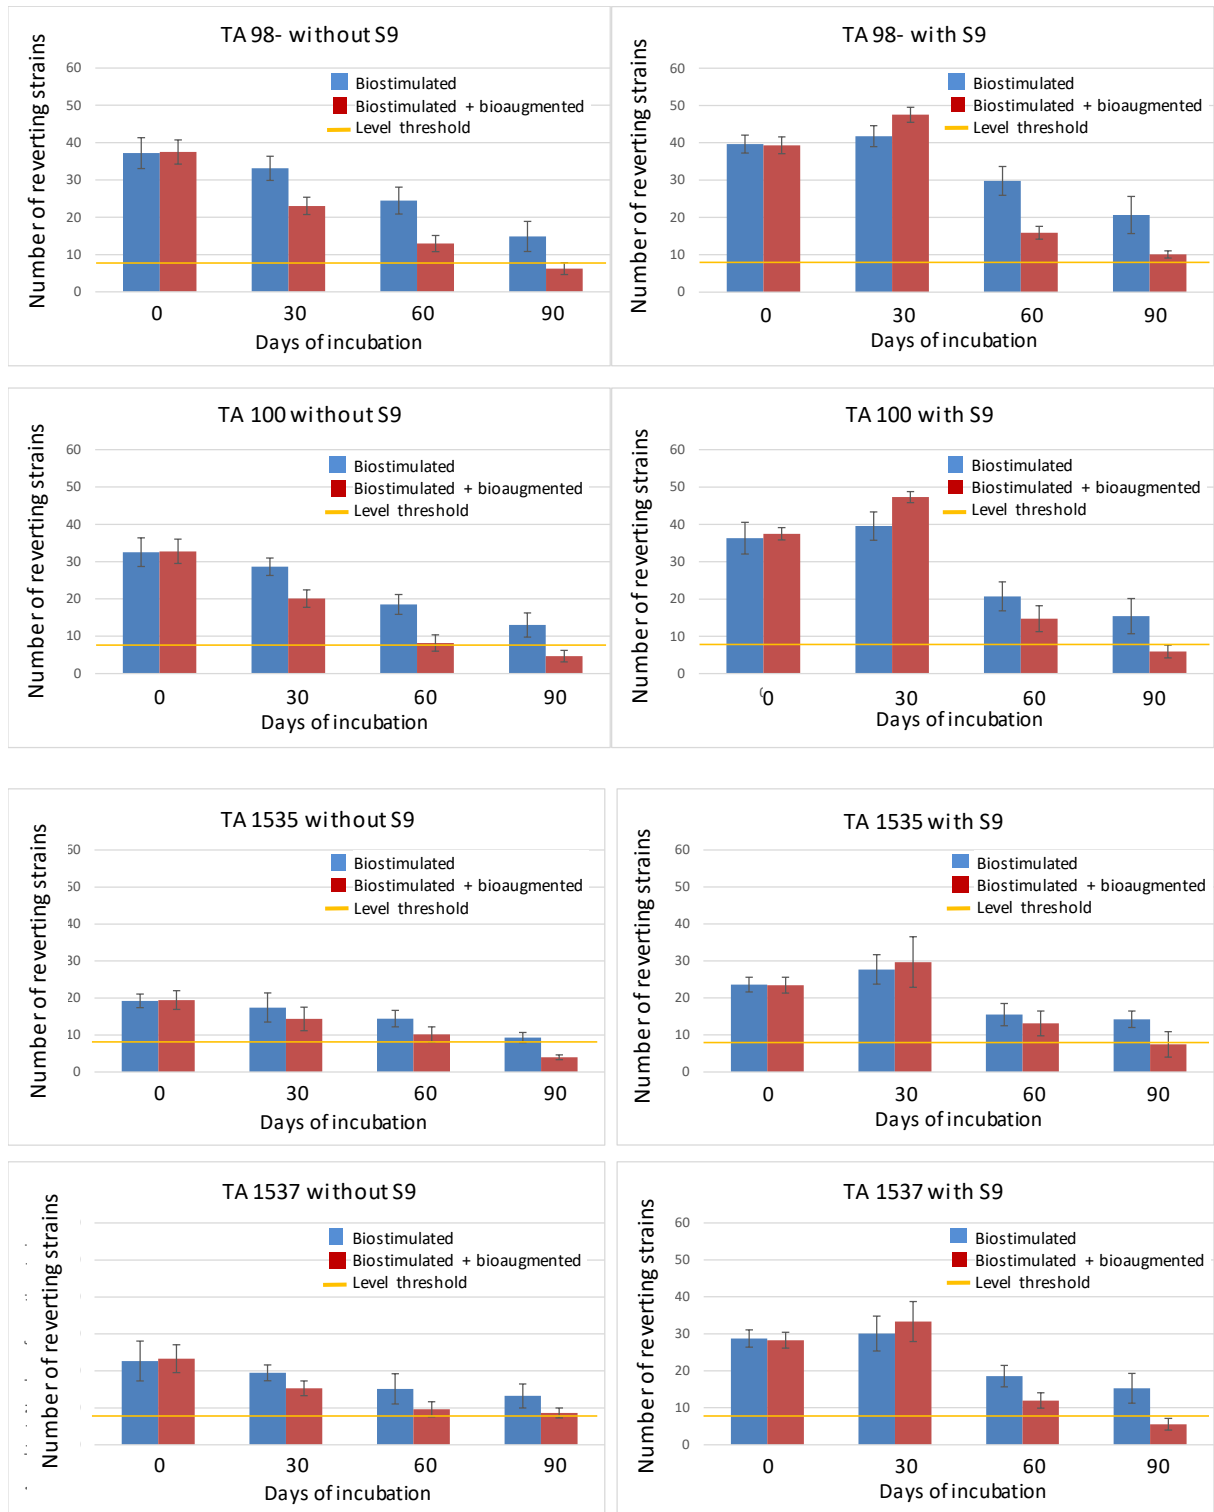

**Figure S1.** Mutagenicity of the sediment for *Salmonella typhimurium* TA 98; TA 100; TA 1535 and TA 1537 without and with S9 supplement (n = 48, tested in triplicate).
